# Supplementary material
Source: publisher figshare collection journal article supplement (https://acs.figshare.com/ndownloader/files/10725772)
Supplement: Supplementary file 1 [file 10725772]

## Sheet: Table S1
Supplementary Table S1 – Percent similarity (mean ± standard deviation) of single sources, without geographical differentiation, to the remainder of the source library.
From/to		Avian					Domestic		Livestock				Wildlife					WWTP
		Bird	Canada goose	Chicken	Gull	Turkey	Cat	Dog	Cow (beef)	Cow (dairy)	Horse	Swine	Beaver	Deer	Kangaroo	Possum	Rabbit	WWTP
Avian	Bird		48.0 ± 26.3	44.5 ± 30.8	74.6 ± 24.7	82.7 ± 14.7	11.0 ± 9.7	29.3 ± 28.6	8.0 ± 5.0	1.6 ± 1.5	3.6 ± 8.6	17.4 ± 9.5	0.0 ± 0.0	1.2 ± 3.6	18.6 ± 28.3	8.3 ± 20.0	1.7 ± 6.7	40.6 ± 23.1
	Canada goose	77.3 ± 27.1		42.3 ± 27.2	80.9 ± 20.7	83.9 ± 13.8	24.6 ± 9.5	47.2 ± 23.8	9.9 ± 5.0	3.2 ± 1.7	6.3 ± 13.1	16.8 ± 7.5	0.5 ± 0.7	4.5 ± 10.9	21.8 ± 29.1	7.6 ± 21.2	2.6 ± 8.8	48.7 ± 19.9
	Chicken	38.9 ± 37.9	49.8 ± 14.9		53.4 ± 27.7	99.5 ± 1.4	28.3 ± 12.3	31.7 ± 24.6	10.6 ± 5.2	5.3 ± 2.5	6.5 ± 7.1	21.7 ± 7.3	2.6 ± 3.0	4.8 ± 2.4	21.7 ± 27.7	15.3 ± 18.5	6.3 ± 3.4	9.7 ± 7.8
	Gull	73.5 ± 27.3	47.6 ± 33.3	65.2 ± 42.0		97.3 ± 2.5	13.8 ± 15.5	17.7 ± 23.8	3.2 ± 3.5	0.0 ± 0.1	4.8 ± 9.0	25.2 ± 10.1	0.1 ± 0.2	2.2 ± 6.3	19.7 ± 29.7	4.9 ± 19.4	2.4 ± 8.8	31.8 ± 21.8
	Turkey	30.3 ± 32.5	26.2 ± 22.3	70.5 ± 31.2	42.8 ± 29.7		11.9 ± 11.2	27.4 ± 25.4	8.8 ± 2.5	4.1 ± 2.9	0.0 ± 0.0	21.3 ± 8.2	14.0 ± 12.7	1.0 ± 1.7	17.3 ± 28.1	1.2 ± 3.7	0.1 ± 0.6	1.6 ± 2.2
Domestic	Cat	43.7 ± 42.5	33.4 ± 29.0	39.0 ± 23.5	42.9 ± 33.6	77.5 ± 15.7		89.4 ± 16.2	9.1 ± 4.5	3.7 ± 2.0	3.6 ± 3.1	25.5 ± 9.5	1.2 ± 1.9	4.6 ± 3.2	8.9 ± 7.4	3.7 ± 10.0	3.6 ± 2.2	12.4 ± 9.1
	Dog	48.5 ± 44.9	43.3 ± 28.6	57.1 ± 36.0	42.6 ± 34.0	89.7 ± 10.0	77.5 ± 15.8		11.1 ± 4.0	4.0 ± 2.0	1.8 ± 1.5	27.6 ± 9.0	0.9 ± 1.6	1.5 ± 2.1	20.1 ± 27.0	3.6 ± 10.0	0.9 ± 1.7	9.4 ± 8.6
Livestock	Cow (beef)	29.9 ± 34.8	31.7 ± 20.2	49.6 ± 27.0	11.5 ± 13.4	79.8 ± 13.1	3.6 ± 4.5	16.7 ± 27.9		77.3 ± 7.1	11.1 ± 7.7	22.3 ± 7.3	7.1 ± 4.3	53.7 ± 12.0	52.5 ± 13.3	7.3 ± 16.3	2.1 ± 3.5	5.5 ± 7.0
	Cow (dairy)	10.1 ± 19.5	15.0 ± 16.0	28.2 ± 22.5	0.2 ± 0.7	71.4 ± 17.4	5.9 ± 6.4	16.6 ± 27.5	89.9 ± 5.8		5.2 ± 4.2	23.6 ± 6.8	9.7 ± 4.0	64.1 ± 12.2	40.6 ± 14.6	3.4 ± 5.8	3.0 ± 5.6	0.3 ± 0.9
	Horse	33.6 ± 43.9	37.9 ± 31.7	6.0 ± 12.8	35.0 ± 42.0	0.0 ± 0.0	11.5 ± 7.8	7.0 ± 16.7	17.0 ± 4.0	17.9 ± 4.9		20.0 ± 8.4	0.7 ± 1.6	12.5 ± 7.0	42.4 ± 20.2	6.2 ± 16.3	7.3 ± 6.0	15.8 ± 16
	Swine	31.6 ± 37.8	30.2 ± 24.1	59.1 ± 31.2	35.7 ± 30.6	83.0 ± 10.8	41.4 ± 15.3	53.9 ± 29.1	22.9 ± 5.2	19.5 ± 7.8	20.7 ± 4.5		8.6 ± 5.0	20.0 ± 9.3	16.5 ± 5.3	5.3 ± 9.1	8.7 ± 7.6	9.2 ± 7.5
Wildlife	Beaver	0.0 ± 0.0	9.2 ± 12.3	15.2 ± 13.7	0.8 ± 2.6	62.7 ± 16.3	4.9 ± 7.5	8.2 ± 13.6	10.3 ± 2.2	13.0 ± 2.6	2.1 ± 2.4	10.9 ± 3.6		8.5 ± 3.2	3.4 ± 3.3	13.9 ± 8.7	11.7 ± 6.6	0.7 ± 1.1
	Deer	31.1 ± 37.6	28.6 ± 22.0	32.4 ± 22.6	16.3 ± 22.0	71.1 ± 18.0	9.8 ± 8.9	27.2 ± 28.3	67.9 ± 6.8	65.3 ± 8.1	9.0 ± 3.8	24.0 ± 8.8	15.1 ± 5.9		44.2 ± 11.5	8.8 ± 12.7	15.2 ± 9.6	4.2 ± 5.3
	Kangaroo	29.9 ± 33.7	40.2 ± 25.3	13.7 ± 13.1	38.1 ± 27.9	2.3 ± 3.3	10.3 ± 12.0	6.3 ± 9.6	44.5 ± 5.2	44.8 ± 4.4	20.2 ± 11.7	15.9 ± 6.5	2.1 ± 2.1	43.1 ± 11.3		9.6 ± 17.1	4.2 ± 3.6	8.7 ± 8.2
	Possum	45.8 ± 38.3	21.8 ± 21.2	8.2 ± 11.4	11.2 ± 13.9	3.0 ± 5.9	3.0 ± 3.7	7.6 ± 16.1	5.4 ± 1.5	3.3 ± 1.5	3.7 ± 7.8	5.3 ± 3.1	3.1 ± 3.4	6.2 ± 3.8	10.7 ± 7.8		10.4 ± 6.0	10.6 ± 7.7
	Rabbit	36.4 ± 37.9	15.1 ± 19.3	6.9 ± 9.1	34.1 ± 29.7	4.3 ± 11.1	9.5 ± 11.4	2.8 ± 13.1	6.8 ± 3.2	4.8 ± 4.4	0.9 ± 2.4	3.4 ± 2.1	6.4 ± 5.2	17.1 ± 10.8	23.0 ± 27.3	20.6 ± 14.9		4.1 ± 5.8
WWTP	WWTP	71.3 ± 33.4	51.3 ± 23.7	35.6 ± 29.8	54.8 ± 35.9	85.9 ± 13.4	53.5 ± 22.9	60.6 ± 29.3	5.6 ± 6.2	0.4 ± 1.0	12.6 ± 9.1	31.2 ± 14.5	1.9 ± 2.1	3.6 ± 4.5	12.1 ± 9.7	16.3 ± 22.1	2.5 ± 6.9
